# Supplementary material
Source: PubMed Central journal article supplement (PMC3807548)
Supplement: Supp_Table1.pdf [file Supp_Table1.pdf]

**A.**

|                               | Blood Glucose (mg/dl) |                 |                 |
|-------------------------------|-----------------------|-----------------|-----------------|
|                               | Pre-surgery           | Week 1          | Week 2          |
| <i>C57BLKS/J</i>              | 269.5 +/- 4.193       | 174.0 +/- 6.976 | 215.5 +/- 27.24 |
| <i>C57BLKS/J-m+/+Lepr(db)</i> |                       |                 |                 |
| + GST/III1H,8-10              | 866.3 +/- 40.61       | 778.5 +/- 72.30 | 872.1 +/- 80.76 |
| + GST/III1H,8,10              | 890.0 +/- 65.00       | 752.1 +/- 55.69 | 774.4 +/- 63.59 |
| + GST/III1H,8 <sup>RGD</sup>  | 735.4 +/- 61.57       | 666.3 +/- 64.04 | 728.9 +/- 52.25 |
| + GST                         | 777.1 +/- 36.95       | 690.9 +/- 76.51 | 767.4 +/- 58.81 |

**B.**

|                               | Weight (g)    |               |               |
|-------------------------------|---------------|---------------|---------------|
|                               | Pre-surgery   | Week 1        | Week 2        |
| <i>C57BLKS/J</i>              | 24.8 +/- 0.85 | 23.5 +/- 0.64 | 23.8 +/- 0.62 |
| <i>C57BLKS/J-m+/+Lepr(db)</i> |               |               |               |
| + GST/III1H,8-10              | 43.3 +/- 0.88 | 42.1 +/- 0.71 | 42.1 +/- 0.65 |
| + GST/III1H,8,10              | 42.1 +/- 1.10 | 40.9 +/- 0.99 | 40.4 +/- 0.91 |
| + GST/III1H,8 <sup>RGD</sup>  | 42.8 +/- 1.10 | 41.5 +/- 0.90 | 41.5 +/- 0.84 |
| + GST                         | 42.1 +/- 1.12 | 40.7 +/- 1.03 | 40.3 +/- 0.94 |

**Supplemental Table 1. Glucose and weight measurements of wild type and diabetic mice.**

(A) Glucose and (B) weight measurements were obtained from wild type ('C57BLKS/J') and diabetic ('C57BLKS/J-m+/+Lepr(db)') mice three days prior to surgery ('Pre-surgery') and during the first and second week following surgery. Data are presented as a mean value +/- SEM for wild type (n=4) and diabetic mice treated with GST/III1H,8-10 (n=12), GST/III1H,8,10 (n=14), GST/III1H,8<sup>RGD</sup> (n=13) or GST (n=13). There were no significant differences in blood glucose or weight as a result of protein treatment.
